# Supplementary material
Source: MDPI journal article supplement (https://www.mdpi.com/2073-4395/13/4/1164)
Supplement: s1 [file s1]

## Supplement S1

**Table S1.** List of grass species with varieties registered according to OECD [62].

| No. | Species name                    | lawn-grass | other use | total |
|-----|---------------------------------|------------|-----------|-------|
| 1   | <i>Agropyron cristatum</i>      | 8          | 0         | 8     |
| 2   | <i>Agropyron desertorum</i>     | 0          | 4         | 4     |
| 3   | <i>Agrostis canina - canina</i> | 8          | 0         | 8     |
| 4   | <i>Agrostis capillaris</i>      | 44         | 9         | 53    |
| 5   | <i>Agrostis gigantea</i>        | 0          | 8         | 8     |
| 6   | <i>Agrostis stolonifera</i>     | 78         | 0         | 78    |
| 7   | <i>Alopecurus pratensis</i>     | 0          | 10        | 10    |
| 8   | <i>Andropogon gayanus</i>       | 0          | 6         | 6     |
| 9   | <i>Andropogon gerardii</i>      | 0          | 3         | 3     |
| 10  | <i>Arrhenatherum elatius</i>    | 0          | 6         | 6     |
| 11  | <i>Bouteloua gracilis</i>       | 1          | 0         | 1     |
| 12  | <i>Bromus biebersteinii</i>     | 0          | 2         | 2     |
| 13  | <i>Bromus catharticus</i>       | 0          | 23        | 23    |
| 14  | <i>Bromus inermis</i>           | 0          | 27        | 27    |
| 15  | <i>Bromus parodii</i>           | 0          | 3         | 3     |
| 16  | <i>Bromus stamineus</i>         | 0          | 6         | 6     |
| 17  | <i>Cenchrus americanus</i>      | 0          | 37        | 37    |
| 18  | <i>Cenchrus ciliaris</i>        | 0          | 5         | 5     |
| 19  | <i>Cenchrus clandestinus</i>    | 0          | 2         | 2     |
| 20  | <i>Chloris gayana</i>           | 0          | 12        | 12    |
| 21  | <i>Cynodon dactylon</i>         | 0          | 31        | 31    |
| 22  | <i>Cynosurus cristatus</i>      | 0          | 3         | 3     |
| 23  | <i>Dactylis glomerata</i>       | 0          | 211       | 211   |
| 24  | <i>Deschampsia cespitosa</i>    | 1          | 3         | 4     |
| 25  | <i>Digitaria eriantha</i>       | 0          | 2         | 2     |
| 26  | <i>Elymus lanceolatus</i>       | 0          | 2         | 2     |
| 27  | <i>Elymus repens - repens</i>   | 0          | 1         | 1     |
| 28  | <i>Elymus trachycaulus</i>      | 0          | 2         | 2     |
| 29  | <i>Eragrostis curvula</i>       | 0          | 6         | 6     |
| 30  | <i>Eragrosties tef</i>          | 0          | 7         | 7     |
| 31  | <i>Eremochloa ophiuroides</i>   | 0          | 1         | 1     |
| 32  | <i>Festuca arundinacea</i>      | 286        | 296       | 582   |
| 33  | <i>Festuca ovina</i>            | 64         | 16        | 80    |
| 34  | <i>Festuca pratensis</i>        | 0          | 116       | 116   |
| 35  | <i>Festuca rubra</i>            | 311        | 103       | 414   |
| 36  | <i>Koeleria macrantha</i>       | 3          | 0         | 3     |
| 37  | <i>Lolium multiflorum</i>       | 23         | 664       | 687   |
| 38  | <i>Lolium perenne</i>           | 601        | 1010      | 1611  |
| 39  | <i>Lolium rigidum</i>           | 0          | 3         | 3     |
| 40  | <i>Lolium xhybridum</i>         | 0          | 132       | 132   |
| 41  | <i>Nassella viridula</i>        | 0          | 1         | 1     |
| 42  | <i>Panicum coloratum</i>        | 0          | 4         | 4     |

|       |                                |      |      |      |
|-------|--------------------------------|------|------|------|
| 43    | <i>Panicum maximum</i>         | 0    | 12   | 12   |
| 44    | <i>Panicum miliaceum</i>       | 0    | 26   | 26   |
| 45    | <i>Panicum virgatum</i>        | 0    | 3    | 3    |
| 46    | <i>Paspalum smithii</i>        | 0    | 1    | 1    |
| 47    | <i>Paspalum notatum</i>        | 0    | 3    | 3    |
| 48    | <i>Paspalum vaginatum</i>      | 0    | 4    | 4    |
| 49    | <i>Phalaris aquatica</i>       | 0    | 20   | 20   |
| 50    | <i>Phalaris arundinacea</i>    | 0    | 13   | 13   |
| 51    | <i>Phleum nodosum</i>          | 5    | 0    | 5    |
| 52    | <i>Phleum pratense</i>         | 0    | 133  | 133  |
| 53    | <i>Poa annua</i>               | 1    | 0    | 1    |
| 54    | <i>Poa compressa</i>           | 4    | 0    | 4    |
| 55    | <i>Poa nemoralis</i>           | 5    | 0    | 5    |
| 56    | <i>Poa palustris</i>           | 0    | 1    | 1    |
| 57    | <i>Poa pratensis</i>           | 228  | 58   | 286  |
| 58    | <i>Poa secunda</i>             | 0    | 1    | 1    |
| 59    | <i>Poa trivialis</i>           | 20   | 0    | 20   |
| 60    | <i>Psathyrostachys juncea</i>  | 0    | 1    | 1    |
| 61    | <i>Pseudoroegneria spicata</i> | 0    | 1    | 1    |
| 62    | <i>Puccinellia distans</i>     | 2    | 0    | 2    |
| 63    | <i>Schizachyrium scoparium</i> | 2    | 0    | 2    |
| 64    | <i>Setaria italica</i>         | 0    | 14   | 14   |
| 65    | <i>Setaria sphacelata</i>      | 0    | 5    | 5    |
| 66    | <i>Sorghastrum nutans</i>      | 1    | 0    | 1    |
| 67    | <i>Thinopyrum elongatum</i>    | 0    | 8    | 8    |
| 68    | <i>Thinopyrum intermedium</i>  | 0    | 9    | 9    |
| 69    | <i>Trisetum flavescens</i>     | 0    | 7    | 7    |
| 70    | <i>Urochloa humidicola</i>     | 0    | 7    | 7    |
| 71    | <i>Urochloa mosambicensis</i>  | 0    | 3    | 3    |
| 72    | <i>xFestulolium</i>            | 0    | 60   | 60   |
| 73    | <i>Zoysia japonica</i>         | 5    | 0    | 5    |
| Total |                                | 1701 | 3167 | 4868 |
