# Supplementary material
Source: MDPI journal article supplement (https://www.mdpi.com/2073-4395/13/4/1164)
Supplement: s1 [file s1]

## Supplement 2

Table S2. List of ornamental grass species, its origin and cultivars presence [110].

| No. | Genus               | Species, subspecies                        | Authority                             | Origin                                                                       | Cultivars |
|-----|---------------------|--------------------------------------------|---------------------------------------|------------------------------------------------------------------------------|-----------|
| 1   | <i>Achnatherum</i>  | <i>calamagrostis</i>                       | (Linnaeus) P.Beauvois                 | C., SE Europe                                                                | yes       |
| 2   | <i>Achnatherum</i>  | <i>coronatum</i>                           | (Thurber) Barkworth                   | N. America, SE California, Mexico                                            |           |
| 3   | <i>Achnatherum</i>  | <i>extremiorientale</i>                    | (Hara) Keng                           | Japan, China, Korea, E. of Russia (Siberia)                                  |           |
| 4   | <i>Achnatherum</i>  | <i>hymenoides</i>                          | (Roemer & Schultes) Barkworth         | WN. North America                                                            |           |
| 5   | <i>Achnatherum</i>  | <i>robustum</i>                            | (Vasey) Barkworth                     | S. Dakota, Wyoming, Texas, Arizona, N.Mexico                                 |           |
| 6   | <i>Achnatherum</i>  | <i>speciosum</i>                           | (Trinius & Rup.) Barkworth            | California, Colorado, S.Mexico                                               |           |
| 7   | <i>Achnatherum</i>  | <i>splendens</i>                           | (Trinius) Nevski                      | C. Asia, Siberia                                                             |           |
| 8   | <i>Agropyron</i>    | <i>juncum</i>                              | (Linnaeus) P.Beauvois                 |                                                                              |           |
| 9   | <i>Alopecurus</i>   | <i>borealis</i>                            | Trinius                               | Circumpolar and high Arctic                                                  | yes       |
| 10  | <i>Alopecurus</i>   | <i>pretensis</i>                           | Linnaeus                              | Eurasia                                                                      | yes       |
| 11  | <i>Ammophila</i>    | <i>arenaria</i>                            | Linnaeus                              | Europe                                                                       |           |
| 12  | <i>Ammophila</i>    | <i>breviligulata</i>                       | Fernald                               | N. America (Eastern coast)<br>NW. Africa, Mediterranean from east to western | yes       |
| 13  | <i>Ampelodesmus</i> | <i>mauritanicus</i>                        | (Poiret) T.Durand & Schinz            | Grece                                                                        |           |
| 14  | <i>Andropogon</i>   | <i>gerardii</i>                            | Vitman                                | N.America - S. to C. Mexico                                                  | yes       |
| 15  | <i>Andropogon</i>   | <i>glomeratus</i>                          | (Walter) Britton, Sterns & Poggenberg | E.N. America                                                                 |           |
| 16  | <i>Andropogon</i>   | <i>glomeratus</i> var. <i>scabriglumis</i> | C.S. Campbell                         | N.America - S. to C. Mexico                                                  |           |
| 17  | <i>Andropogon</i>   | <i>gyrans</i>                              | Ashe                                  | E.N. America                                                                 |           |
| 18  | <i>Andropogon</i>   | <i>hallii</i>                              | Hackel                                | N.America - S. to C. Mexico                                                  | yes       |
| 19  | <i>Andropogon</i>   | <i>ternarius</i>                           | Michaux                               | E. N. America                                                                |           |
| 20  | <i>Andropogon</i>   | <i>virginicus</i>                          | Linnaeus                              | N. America                                                                   |           |
| 21  | <i>Andropogon</i>   | <i>virginicus</i> var. <i>glaucus</i>      | Hackel                                | Texas, Florida N. to S. New Jersey                                           | yes       |
| 22  | <i>Anemantbele</i>  | <i>lessoniana</i>                          | (Steudel) Veldkamp                    | New Zealand (N. and S. Islands)                                              | yes       |
| 23  | <i>Arisitda</i>     | <i>purpurea</i>                            | Nuttall                               | N. America                                                                   |           |
| 24  | <i>Arisitda</i>     | <i>srticta</i>                             | Michaux                               | N. Carolina, Florida, Mississippi                                            |           |

| No. | Genus                 | Species, subspecies         | Authority                                           | Origin                                          | Cultivars |
|-----|-----------------------|-----------------------------|-----------------------------------------------------|-------------------------------------------------|-----------|
| 25  | <i>Arrhenatherum</i>  | <i>elatus ssp. bulbosum</i> | (Willdenow) Schubler & G. Martens                   | not native, only cultivar                       | yes       |
| 26  | <i>Arundo</i>         | <i>donax</i>                | Linnaeus                                            | Mediterranean region                            | yes       |
| 27  | <i>Arundo</i>         | <i>formosana</i>            | Hackel                                              | E. Asia                                         | yes       |
| 28  | <i>Arundo</i>         | <i>plinii</i>               | Turra<br>(Labillardiere) S.W.L. Jacobs & J. Everett | E. Asia                                         |           |
| 29  | <i>Austrostipa</i>    | <i>elengatissima</i>        | J. Everett                                          | Australia                                       |           |
| 30  | <i>Austrostipa</i>    | <i>ramosissima</i>          | (Trinius) S.W.L. Jacobs & J. Everett                | Australia                                       |           |
| 31  | <i>Austrostipa</i>    | <i>stipoides</i>            | (Hooker f.) S.W.L. Jacobs & J. Everett              | Australia                                       |           |
| 32  | <i>Beckmannia</i>     | <i>eruciformis</i>          | (Linnaeus) Host                                     | Eurasia                                         | yes       |
| 33  | <i>Blepharoneuron</i> | <i>tricholepis</i>          | (Torrey) Nash                                       | Arizona, New Mexico, Colorado, Utah             |           |
| 34  | <i>Botriochloa</i>    | <i>barbinodis</i>           | (Lagasca) Herter                                    | Oklahoma, New Mexico, Texas, California, Mexico |           |
| 35  | <i>Botriochloa</i>    | <i>caucasica</i>            | (Trinn.) C.E. Hubbard                               |                                                 |           |
| 36  | <i>Botriochloa</i>    | <i>ischaemum</i>            | (Linnaeus) Keng                                     | Europe                                          |           |
| 37  | <i>Bouteloua</i>      | <i>curtipendula</i>         | (Michaux) Torrey<br>(Humboldt, Bonpland & Kunth)    | N. America, S. Argentina                        |           |
| 38  | <i>Bouteloua</i>      | <i>gracilis</i>             | Griffiths                                           | N. America                                      |           |
| 39  | <i>Brachypodium</i>   | <i>pinnatum</i>             | (Linnaeus) P. Beauvois                              | Europe                                          |           |
| 40  | <i>Brachypodium</i>   | <i>sylvaticum</i>           | (Hudson) P. Beauvois                                | Europe                                          |           |
| 41  | <i>Briza</i>          | <i>media</i>                | Linnaeus                                            | Eurasia                                         | yes       |
| 42  | <i>Bromus</i>         | <i>inermis</i>              | Leysser                                             | Eurasia                                         | yes       |
| 43  | <i>Bromus</i>         | <i>riparius</i>             | Rehmann                                             | Eurasia                                         |           |
| 44  | <i>Buchloe</i>        | <i>dactyloides</i>          | (Nuttall) Engelman                                  | N. America                                      | yes       |
| 45  | <i>Calamagrostis</i>  | <i>arundinacea</i>          | (Linnaeus) Roth                                     | Eurasia                                         |           |
| 46  | <i>Calamagrostis</i>  | <i>brachytricha</i>         | Steudel                                             | Asia                                            |           |
| 47  | <i>Calamagrostis</i>  | <i>canadensis</i>           | (Michaux) P. Beauvois                               | N. America                                      |           |
| 48  | <i>Calamagrostis</i>  | <i>epigejos</i>             | (Linnaeus) Roth                                     | Eurasia                                         |           |
| 49  | <i>Calamagrostis</i>  | <i>foliosa</i>              | Kearney                                             | Eurasia                                         |           |
| 50  | <i>Calamagrostis</i>  | <i>nutkaensis</i>           | (C. Presl) Steudel                                  | N.America Pacific Coast                         |           |
| 51  | <i>Calamagrostis</i>  | <i>ophitidis</i>            | (J.Howell) Nygren                                   | N. California                                   |           |

| No. | Genus                | Species, subspecies | Authority                                     | Origin                         | Cultivars |
|-----|----------------------|---------------------|-----------------------------------------------|--------------------------------|-----------|
| 52  | <i>Calamagrostis</i> | <i>x acutiflora</i> | (Schrader) De Candolle                        | Europe                         | yes       |
| 53  | <i>Chasmanthium</i>  | <i>latifolium</i>   | (Michaux) Yates                               | N. America                     |           |
| 54  | <i>Chasmanthium</i>  | <i>laxum</i>        | (Linnaeus) Yates                              | N. America                     |           |
| 55  | <i>Chasmanthium</i>  | <i>sessiflorum</i>  | (Poirot) Yates                                | N. America                     |           |
| 56  | <i>Chinochloa</i>    | <i>conspicua</i>    | (Forster f.) Zotov                            | New Zealand                    |           |
| 57  | <i>Chinochloa</i>    | <i>flavescens</i>   | (Hooker f.) Zotov                             | New Zealand                    |           |
| 58  | <i>Chinochloa</i>    | <i>flavicans</i>    | Zotov                                         | New Zealand                    |           |
| 59  | <i>Chinochloa</i>    | <i>rubra</i>        | Zotov                                         | New Zealand                    |           |
| 60  | <i>Chodropetalum</i> | <i>tectorum</i>     | (Linnaeus f.) Rafinesque                      | S. Africa                      |           |
| 61  | <i>Cortaderia</i>    | <i>fulvida</i>      | (Buchanan) Zotov                              | New Zealand                    |           |
| 62  | <i>Cortaderia</i>    | <i>jubata</i>       | (Lemoine) Stapf                               | S. America                     |           |
| 63  | <i>Cortaderia</i>    | <i>richardii</i>    | (Endlicher) Zotov                             | New Zealand                    |           |
| 64  | <i>Cortaderia</i>    | <i>selloana</i>     | (Schultes & Schultes f.) Ascherson & Graebner | Brazil, Argentina and Chile    | yes       |
| 65  | <i>Cortaderia</i>    | <i>toetoe</i>       | Zotov                                         | New Zealand                    |           |
| 66  | <i>Corynephorus</i>  | <i>canescens</i>    | (Linnaeus) P. Beauvois                        | Eurasia                        |           |
| 67  | <i>Ctenium</i>       | <i>aromaticum</i>   | (Walter) Wood                                 | N. America                     |           |
| 68  | <i>Ctenium</i>       | <i>floridanum</i>   | (Hitchcock) Hitchcock                         | N. America                     |           |
| 69  | <i>Cymbopogon</i>    | <i>citratus</i>     | (De Candolle ex Ness) Stapf                   | India and Sri Lanka            |           |
| 70  | <i>Dactylis</i>      | <i>glomerata</i>    | Linnaeus                                      | Eurasia                        | yes       |
| 71  | <i>Deschampsia</i>   | <i>cespitosa</i>    | (Linnaeus) P. Beauvois                        | N. America, Europe and E. Asia | yes       |
| 72  | <i>Deschampsia</i>   | <i>flexuosa</i>     | (Linnaeus) Trinius                            | N. America, Europe and E. Asia | yes       |
| 73  | <i>Dichanthelium</i> | <i>clandestinum</i> | (Linnaeus) Gold                               | E. United States               |           |
| 74  | <i>Digitaria</i>     | <i>californica</i>  | (Benth.) Henr.                                |                                |           |
| 75  | <i>Elymus</i>        | <i>arenarius</i>    | Linnaeus                                      |                                |           |
| 76  | <i>Elymus</i>        | <i>canadensis</i>   | Linnaeus                                      | N. America                     |           |
| 77  | <i>Elymus</i>        | <i>glaucus</i>      | Buckley                                       | N. America                     |           |
| 78  | <i>Elymus</i>        | <i>hispidus</i>     | (Opitz) Melderis                              | Eurasia, N. America            |           |

| No. | Genus             | Species, subspecies    | Authority            | Origin                                                                     | Cultivars |
|-----|-------------------|------------------------|----------------------|----------------------------------------------------------------------------|-----------|
| 79  | <i>Elymus</i>     | <i>hystrix</i>         | Linnaeus             | N. America                                                                 |           |
| 80  | <i>Elymus</i>     | <i>magellanicus</i>    | (Desvaux) A. Love    | S. America                                                                 |           |
| 81  | <i>Elymus</i>     | <i>solandri</i>        | (Steudel) Connor     | New Zealand                                                                |           |
| 82  | <i>Elymus</i>     | <i>virginicus</i>      | Linnaeus             | N. America                                                                 |           |
| 83  | <i>Elytrigia</i>  | <i>elongata</i>        | (Host) Nevski        | Mediterranean region                                                       | yes       |
| 84  | <i>Eragrostis</i> | <i>chloromelas</i>     | Steudel              | N. America, Europe                                                         |           |
| 85  | <i>Eragrostis</i> | <i>curvula</i>         | (Schrader) Ness      | S. Africa                                                                  |           |
| 86  | <i>Eragrostis</i> | <i>elliotti</i>        | S. Watson            | S.E. United States, C. and S. America                                      | yes       |
| 87  | <i>Eragrostis</i> | <i>intermedia</i>      | Hitchcock            |                                                                            |           |
| 88  | <i>Eragrostis</i> | <i>spectabilis</i>     | (Pursh) Steudel      | N. and C. America                                                          |           |
| 89  | <i>Eragrostis</i> | <i>trichodes</i>       | (Nuttall) A.Wood     | United States                                                              | yes       |
| 90  | <i>Eragrostis</i> | <i>trichophora</i>     | Cosson & Durieu      | S. Africa                                                                  |           |
| 91  | <i>Festuca</i>    | <i>actae</i>           | Connor               | New Zealand                                                                |           |
| 92  | <i>Festuca</i>    | <i>alpina</i>          | Suter                | S. Alps (Europe)                                                           |           |
| 93  | <i>Festuca</i>    | <i>amethystina</i>     | Linnaeus             | C. Europe                                                                  | yes       |
| 94  | <i>Festuca</i>    | <i>californica</i>     | Vasey                | United States (Oregon, California)                                         | yes       |
| 95  | <i>Festuca</i>    | <i>coxii</i>           | (Petrie) Hackel      | New Zealand                                                                |           |
| 96  | <i>Festuca</i>    | <i>filiformis</i>      | Pourret              | Europe                                                                     |           |
| 97  | <i>Festuca</i>    | <i>gautieri</i>        | (Hackel) K.Richter   | Europe (France and Spain)                                                  | yes       |
| 98  | <i>Festuca</i>    | <i>glacialis</i>       | Miegev.              | S.- W. Europe (Pyrenees)                                                   |           |
| 99  | <i>Festuca</i>    | <i>glauca</i>          | Villars, non Lamarck | S. France                                                                  | yes       |
| 100 | <i>Festuca</i>    | <i>idahoensis</i>      | Elmer                | N. America (from British Colombia to S.Alberta, C.California and Colorado) | yes       |
| 101 | <i>Festuca</i>    | <i>longifolia</i>      | Thullier             | Europe                                                                     |           |
| 102 | <i>Festuca</i>    | <i>mairei</i>          | St.Yves              | Marocco                                                                    |           |
| 103 | <i>Festuca</i>    | <i>novae-zelandiae</i> | (Hackel) Cockayne    | New Zealand                                                                |           |
| 104 | <i>Festuca</i>    | <i>ovina</i>           | Linnaeus             | Europe                                                                     | yes       |
| 105 | <i>Festuca</i>    | <i>rubra</i>           | Linnaeus             | Europe , N. America                                                        | yes       |

| No. | Genus                 | Species, subspecies   | Authority                            | Origin                                                                                       | Cultivars |
|-----|-----------------------|-----------------------|--------------------------------------|----------------------------------------------------------------------------------------------|-----------|
| 106 | <i>Festuca</i>        | <i>trachyphylla</i>   | (Hackel) Krajina                     | Europe<br>Eurasia, circumpolar distribution (N.Europe, N.                                    |           |
| 107 | <i>Festuca</i>        | <i>valesiaca</i>      | Schleicher ex Gaudin                 | Asia,                                                                                        | yes       |
| 108 | <i>Festuca</i>        | <i>vivipara</i>       | (Linnaeus) Smith                     | N. America)                                                                                  |           |
| 109 | <i>Glyceria</i>       | <i>grandis</i>        | S.Watson                             | N. America (Quebeck and Nova Scotia, S.Virginia)                                             |           |
| 110 | <i>Glyceria</i>       | <i>maxima</i>         | (Hartman) Holmboe                    | Europe, Asia temperate                                                                       | yes       |
| 111 | <i>Glyceria</i>       | <i>obtusa</i>         | (Muhlenberg) Trinius                 | N.America                                                                                    |           |
| 112 | <i>Glyceria</i>       | <i>striata</i>        | (Lam.) Hitchc.                       |                                                                                              |           |
| 113 | <i>Hakonechloa</i>    | <i>macra</i>          | (Munro) Makino                       | Japan (Honshu)                                                                               | yes       |
| 114 | <i>Helictotrichon</i> | <i>sempervirens</i>   | (Villars) Pigler                     | S.Europe (Alps)                                                                              | yes       |
| 115 | <i>Hemarthria</i>     | <i>altissima</i>      | (Poir.) Stapf. & C.E. Hubbard        |                                                                                              | yes       |
| 116 | <i>Hesperostipa</i>   | <i>comata</i>         | (Trinius & Ruprech) Barkworth        | N.America                                                                                    |           |
| 117 | <i>Hesperostipa</i>   | <i>spartea</i>        | (Trinius) Barkworth                  | N.America                                                                                    |           |
| 118 | <i>Hierochloe</i>     | <i>occidentalis</i>   | Buckley                              | California and Washington                                                                    |           |
| 119 | <i>Hierochloe</i>     | <i>odorata</i>        | (Linnaeus) P.Beauvois                | N.America, Eurasia<br>Europe, Asia temperate, N. Africa (introduced in<br>N. and S. America) |           |
| 120 | <i>Holcus</i>         | <i>lanatus</i>        | Linnaeus                             |                                                                                              |           |
| 121 | <i>Holcus</i>         | <i>mollis</i>         | Linnaeus                             | Europe                                                                                       | yes       |
| 122 | <i>Hordeum</i>        | <i>brachyantherum</i> | Nevski.                              |                                                                                              |           |
| 123 | <i>Hordeum</i>        | <i>jubatum</i>        | Linnaeus                             | N.America (naturalized elswere)                                                              |           |
| 124 | <i>Hystrix</i>        | <i>patula</i>         | Moench.                              | N. America                                                                                   |           |
| 125 | <i>Imperata</i>       | <i>brevifolia</i>     | Vasey                                | W.Texas, Utah, Navada to California                                                          |           |
| 126 | <i>Imperata</i>       | <i>cylindrica</i>     | (Linnaeus) P.Beauvois                | Japan, China (Manchuiria), Korea,                                                            | yes       |
| 127 | <i>Jarava</i>         | <i>ambigua</i>        | (Spegazzini) Penailillo              | S.America                                                                                    |           |
| 128 | <i>Jarava</i>         | <i>caudata</i>        | (Trinius) Penailillo                 | S.America                                                                                    |           |
| 129 | <i>Jarava</i>         | <i>ichu</i>           | Ruiz & Pavon                         | S.America                                                                                    |           |
| 130 | <i>Jarava</i>         | <i>plumosa</i>        | (Trinius) S.W.L. Jacobs & J. Everett | S.America                                                                                    |           |
| 131 | <i>Koeleria</i>       | <i>glauca</i>         | (Schrader) De Candolle               | Europe, N.-T. Asia                                                                           | yes       |
| 132 | <i>Koeleria</i>       | <i>macrantha</i>      | (Ledebour) Schultes                  | N.America, Eurasia                                                                           | yes       |

| No. | Genus               | Species, subspecies                         | Authority                   | Origin                                          | Cultivars |
|-----|---------------------|---------------------------------------------|-----------------------------|-------------------------------------------------|-----------|
| 133 | <i>Leymus</i>       | <i>angustus</i>                             | (Trin.) Pigler              |                                                 |           |
| 134 | <i>Leymus</i>       | <i>arenarius</i>                            | (Linnaeus) Hochstetter      | N., S. Europe                                   | yes       |
| 135 | <i>Leymus</i>       | <i>cinereus</i>                             | (Scribner & Merrill) A.Love | N.America                                       |           |
| 136 | <i>Leymus</i>       | <i>condensatus</i>                          | (Presl) A.Love              | N.America                                       | yes       |
| 137 | <i>Leymus</i>       | <i>mollis</i>                               | (Trinius) Hara              | N. America, N. E. Asia                          |           |
| 138 | <i>Leymus</i>       | <i>racemosus</i>                            | (Lamarck) Tzvelev           | Eurasia                                         |           |
| 139 | <i>Leymus</i>       | <i>triticoideus</i>                         | (Buckley) Piger             | USA (California, Washington, Montana, Texas)    | yes       |
| 140 | <i>Melica</i>       | <i>altissima</i>                            | Linnaeus                    | E.Europe to Siberia                             | yes       |
| 141 | <i>Melica</i>       | <i>californica</i>                          | Scribner                    | USA (California)                                |           |
| 142 | <i>Melica</i>       | <i>ciliata</i>                              | Linnaeus                    | Europe, N.Africa, S.E. Asia                     |           |
| 143 | <i>Melica</i>       | <i>imperfecta</i>                           | Trinius                     | USA (S. California), Mexico                     |           |
| 144 | <i>Melica</i>       | <i>macra</i>                                | Nees                        | S. America                                      |           |
| 145 | <i>Melica</i>       | <i>transsilvanica</i>                       | Schur                       | S. Europe, Middle Asia                          |           |
| 146 | <i>Melinis</i>      | <i>nerviglumis</i>                          | (Franchet) Zizka            | S. Africa                                       |           |
| 147 | <i>Melinis</i>      | <i>repens</i>                               | (Willdenow) Zizka           | Africa                                          |           |
| 148 | <i>Merxmuellera</i> | <i>macowanii</i>                            | (Stapf) Conert              | S. Africa                                       |           |
| 149 | <i>Miscantus</i>    | <i>floridulus</i>                           | (Labillardiere) Warburg     | S.Japan, Taiwan, Pacific Islands                | yes       |
| 150 | <i>Miscantus</i>    | <i>nepalensis</i>                           | (Trinius) Hackel            | Himalaya and Burma                              |           |
| 151 | <i>Miscantus</i>    | <i>oligostachys</i>                         | Stapf                       | Japan                                           | yes       |
| 152 | <i>Miscantus</i>    | <i>sacchariflorus</i>                       | (Maximowicz) Bentham        | Japan, Korea, China (Manchuria)                 | yes       |
| 153 | <i>Miscantus</i>    | <i>sinensis</i>                             | Andersson                   | Japan, Taiwan, S.Kuriles, Korea, China          | yes       |
| 154 | <i>Miscantus</i>    | <i>sinensis</i> var. <i>condensatus</i>     | (Hackel) Makino             | Japan, Korea, China, Indochina, Pacific Islands | yes       |
| 155 | <i>Miscantus</i>    | <i>sinensis</i> var. <i>lutarioriparius</i> | Liu ex S.L. Chen & Renvoize | N.China (Yangtze)                               |           |
| 156 | <i>Miscantus</i>    | <i>tinctorius</i>                           | (Staudel) Hackel            | Japan (Hoshu)                                   |           |
| 157 | <i>Miscantus</i>    | <i>transmorrisonensis</i>                   | Hayata                      | Taiwan                                          |           |
| 158 | <i>Miscantus</i>    | <i>x giganteus</i>                          | Greff & Deuter              | Japan                                           | yes       |
| 159 | <i>Molinia</i>      | <i>caerulea</i>                             | (Linnaeus) Moench           | Eurasia temperate                               | yes       |
| 160 | <i>Molinia</i>      | <i>caerulea</i> ssp. <i>arundinacea</i>     | (Schrnak) H. Paul           | Eurasia temperate                               | yes       |

| No. | Genus               | Species, subspecies  | Authority                                | Origin                                                             | Cultivars |
|-----|---------------------|----------------------|------------------------------------------|--------------------------------------------------------------------|-----------|
| 161 | <i>Muhlenbergia</i> | <i>capillaris</i>    | (Lamarck) Trinius                        | W. Indies, E. Mexico, S.E. USA                                     | yes       |
| 162 | <i>Muhlenbergia</i> | <i>dubia</i>         | Fournier ex Hemsley                      | W. Texas, New Mexico, N.Mexico                                     |           |
| 163 | <i>Muhlenbergia</i> | <i>dubioides</i>     | C.O. Goodding                            | S. Arizona                                                         |           |
| 164 | <i>Muhlenbergia</i> | <i>dumosa</i>        | Scribner ex Vasey                        | Arizona, S. Mexico                                                 |           |
| 165 | <i>Muhlenbergia</i> | <i>emersleyi</i>     | Vasey                                    | Arizona, New Mexico, Texas                                         | yes       |
| 166 | <i>Muhlenbergia</i> | <i>involuta</i>      | Swallen                                  | Edward Plateau - Texas                                             |           |
| 167 | <i>Muhlenbergia</i> | <i>lindheimeri</i>   | Hitchcock<br>(Humboldt, Bonpald & Kunth) | Mexico, Texas                                                      | yes       |
| 168 | <i>Muhlenbergia</i> | <i>pubescens</i>     | Hitchcock<br>(Michaux) Britton, Sterns & | Mexico, Sonoran Desert                                             |           |
| 169 | <i>Muhlenbergia</i> | <i>racemosa</i>      | Poggenberg                               | N. America                                                         |           |
| 170 | <i>Muhlenbergia</i> | <i>reverchonii</i>   | Vasey & Scribner                         | Texas, Oklahoma<br>Arizona, New Mexico, Nevada, Texas, California, |           |
| 171 | <i>Muhlenbergia</i> | <i>rigens</i>        | (Bentham) Hitchcock                      | S.Mexico                                                           |           |
| 172 | <i>Muhlenbergia</i> | <i>rigida</i>        | (Kunth) Trinius                          | Texas, Arizona,                                                    |           |
| 173 | <i>Nasella</i>      | <i>cernua</i>        | (Stebbins & A.Love) Barkworth            | California                                                         |           |
| 174 | <i>Nasella</i>      | <i>lepida</i>        | (Hitchcock) Barkworth                    | California                                                         |           |
| 175 | <i>Nasella</i>      | <i>nessiana</i>      | (Trinius & Ruprecht) Bakworth            | S. America                                                         |           |
| 176 | <i>Nasella</i>      | <i>pulchra</i>       | (Hitchcock) Barkworth                    | California                                                         |           |
| 177 | <i>Nasella</i>      | <i>tenuissima</i>    | (Trinius) Barkworth                      | Texas, New Mexico, Mexico and Argentina                            |           |
| 178 | <i>Nasella</i>      | <i>trichotoma</i>    | (Nees) Kackel ex Arechavaleta            | S.America                                                          |           |
| 179 | <i>Nasella</i>      | <i>viridula</i>      | (Trinius) Barkworth                      | N.America                                                          |           |
| 180 | <i>Panicum</i>      | <i>amarum</i>        | Elliott                                  | N.America coast                                                    | yes       |
| 181 | <i>Panicum</i>      | <i>rigidulum</i>     | Bosc ex Nees                             | Main, Michigan, S.Florida, Texas                                   |           |
| 182 | <i>Panicum</i>      | <i>virgatum</i>      | Linnaeus                                 | N.America                                                          | yes       |
| 183 | <i>Pennisetum</i>   | <i>alopecuroides</i> | (Linnaeus) Sprengel                      | Japan, S.E. Asia                                                   | yes       |
| 184 | <i>Pennisetum</i>   | <i>glaucum</i>       | (Linnaeus) R.Bown                        | Asia                                                               | yes       |
| 185 | <i>Pennisetum</i>   | <i>incomptum</i>     | Nees ex Steudel                          | N.China, Himalaya                                                  |           |
| 186 | <i>Pennisetum</i>   | <i>macrostachyum</i> | (Brongniart) Trinius                     | South Pacific Islands (esp. New Guinea, Borneo)                    | yes       |

| No. | Genus                 | Species, subspecies                     | Authority                       | Origin                                             | Cultivars |
|-----|-----------------------|-----------------------------------------|---------------------------------|----------------------------------------------------|-----------|
| 187 | <i>Pennisetum</i>     | <i>macrourum</i>                        | Trinius                         | Africa                                             |           |
| 188 | <i>Pennisetum</i>     | <i>massaicum</i>                        | Stapf                           | Africa                                             | yes       |
| 189 | <i>Pennisetum</i>     | <i>orientale</i>                        | Richard                         | C. S-E Asia                                        | yes       |
| 190 | <i>Pennisetum</i>     | <i>setaceum</i>                         | (Forsskal) Chiovenda            | Africa, S-E Asia, Arabia                           |           |
| 191 | <i>Pennisetum</i>     | <i>typhoideum</i>                       | Richter                         | Africa, India                                      |           |
| 192 | <i>Pennisetum</i>     | <i>villosum</i>                         | R.Brown ex Fresenius            | N-E Africa                                         |           |
| 193 | <i>Pennisetum</i>     | <i>x advena</i>                         | Wipff & Veldkamp                | [not of natural origin]                            | yes       |
| 194 | <i>Phalaris</i>       | <i>arundinacea</i>                      | Linnaeus                        | N. America, Eurasia                                | yes       |
| 195 | <i>Phragmites</i>     | <i>australis</i>                        | (Cavanilles) Trinius ex Steudel | all continents exc. Antarctica                     | yes       |
| 196 | <i>Phragmites</i>     | <i>australis</i> ssp. <i>altissimus</i> | (Bentham) W.D.Clayton           | Eurasia, present on all continents exc. Antarctica |           |
| 197 | <i>Pleuraphis</i>     | <i>jamesii</i>                          | Torrey                          | California,Texas, Wyoming                          |           |
| 198 | <i>Pleuraphis</i>     | <i>rigida</i>                           | Thurber                         | California,Texas, Wyoming                          |           |
| 199 | <i>Poa</i>            | <i>arachnifera</i>                      | Torrey                          | Texas, Kanasas, Oklahoma                           |           |
| 200 | <i>Poa</i>            | <i>caesia</i>                           | Sm.                             | Tatra Mts., Alps (Transsylvania)                   |           |
| 201 | <i>Poa</i>            | <i>chaixii</i>                          | Villars                         | S-E Europe                                         |           |
| 202 | <i>Poa</i>            | <i>cita</i>                             | Edgar                           | New Zealand                                        |           |
| 203 | <i>Poa</i>            | <i>colensoi</i>                         | Hooker f.                       | New Zealand                                        |           |
| 204 | <i>Poa</i>            | <i>labillardieri</i>                    | Steudel                         | Australia                                          |           |
| 205 | <i>Psatyrostachys</i> | <i>juncea</i>                           | (Fisch.) Nevshi                 |                                                    |           |
| 206 | <i>Saccharum</i>      | <i>alopecuroides</i>                    | (Linnaeus) Nuttall              | New Jersey, S. Indiana, S.Florida, Texas           |           |
| 207 | <i>Saccharum</i>      | <i>arundinaceum</i>                     | Retzius                         | E.Asia                                             |           |
| 208 | <i>Saccharum</i>      | <i>baldwinii</i>                        | Sprengel                        | N. America                                         |           |
| 209 | <i>Saccharum</i>      | <i>brevibarbe</i>                       | (Michaux) Persoon               | USA                                                |           |
| 210 | <i>Saccharum</i>      | <i>contortum</i>                        | (Elliot) Nutall                 | USA                                                |           |
| 211 | <i>Saccharum</i>      | <i>giganteum</i>                        | (Walter) Persoon                | USA, Central America                               |           |
| 212 | <i>Saccharum</i>      | <i>officinarum</i>                      | Linnaeus                        | Asia tropical, South Pacific Islands               | yes       |
| 213 | <i>Saccharum</i>      | <i>ravennae</i>                         | (Linnaeus) Linnaeus             | S. Europe, Meditereanean, N. Africa, W. Asia       |           |
| 214 | <i>Schizachyrium</i>  | <i>litorale</i>                         | (Nash) E.P.Bicknell             | N. America                                         |           |



| No. | Genus                | Species, subspecies  | Authority               | Origin                                   | Cultivars |
|-----|----------------------|----------------------|-------------------------|------------------------------------------|-----------|
| 215 | <i>Schizachyrium</i> | <i>scoparium</i>     | (Michaux) Nash          | N.America                                | yes       |
| 216 | <i>Sesleria</i>      | <i>argentea</i>      | (Savi) Savi             | S-W. Europe, N. Africa                   |           |
| 217 | <i>Sesleria</i>      | <i>autumnalis</i>    | (Scopoli) F.W.Schutz    | S-W. Europe, N. Africa                   |           |
| 218 | <i>Sesleria</i>      | <i>caerulea</i>      | (Linnaeus) Arduino      | Europe                                   |           |
| 219 | <i>Sesleria</i>      | <i>heuffleriana</i>  | Schur                   | Europe                                   |           |
| 220 | <i>Sesleria</i>      | <i>nitida</i>        | Tenore                  | C and S Italy                            |           |
| 221 | <i>Sesleria</i>      | <i>rigida</i>        | Heuffel ex Reichenbach  | Eurasia                                  |           |
| 222 | <i>Setaria</i>       | <i>palmifolia</i>    | (Koenig) Stapf          | Asia tropical                            | yes       |
| 223 | <i>Sorghastrum</i>   | <i>elliottii</i>     | (C.Mohr) Nash           | USA                                      |           |
| 224 | <i>Sorghastrum</i>   | <i>nutans</i>        | (Linnaeus) Nash         | N. America                               | yes       |
| 225 | <i>Sorghastrum</i>   | <i>secundum</i>      | (Elliott) Nash          | USA                                      |           |
| 226 | <i>Spartina</i>      | <i>alterniflora</i>  | Loiseleur-Deslongchamps | N. America, S. America, N. Europe        |           |
| 227 | <i>Spartina</i>      | <i>bakerii</i>       | Merrill                 | S. USA                                   |           |
| 228 | <i>Spartina</i>      | <i>cynosuroides</i>  | (Linnaeus) Roth         | N. America                               |           |
| 229 | <i>Spartina</i>      | <i>patens</i>        | (Aiton) Muhlenberg      | N. America, N. of S. America             |           |
| 230 | <i>Spartina</i>      | <i>pectinata</i>     | Link                    | N. America                               | yes       |
| 231 | <i>Spodiopogon</i>   | <i>sibiricus</i>     | Trinius                 | Japan, Korea, China (Manchuria), Siberia | yes       |
| 232 | <i>Sporobolus</i>    | <i>airoides</i>      | (Torrey) Torrey         | USA                                      |           |
| 233 | <i>Sporobolus</i>    | <i>heterolepis</i>   | (A.Gray) A. Gray        | N. America                               | yes       |
| 234 | <i>Sporobolus</i>    | <i>wrightii</i>      | Munro ex Scribner       | USA, Mexico                              |           |
| 235 | <i>Stenotaphrum</i>  | <i>secundatum</i>    | (Walter) Kuntze         | New and Old World tropics                | yes       |
| 236 | <i>Stipa</i>         | <i>barbata</i>       | Desfontaines            | S. Europe, N. Africa                     |           |
| 237 | <i>Stipa</i>         | <i>calamagrostis</i> | (Linnaeus) Wahlenberg   | Europe                                   | yes       |
| 238 | <i>Stipa</i>         | <i>capillata</i>     | Linnaeus                | C, S Europe, India, E. Asia              |           |
| 239 | <i>Stipa</i>         | <i>gigantea</i>      | Link                    | S-W. Europe, N. Africa                   | yes       |
| 240 | <i>Stipa</i>         | <i>grandis</i>       | P.Smironov              | Siberia, China , Mongolia                |           |
| 241 | <i>Stipa</i>         | <i>ichu</i>          | (Ruiz. & Pav.) Kunth    | N., S. America                           |           |
| 242 | <i>Stipa</i>         | <i>lessingiana</i>   | Trinius & Ruprecht      | Eurasia                                  |           |

| No. | Genus               | Species, subspecies | Authority                         | Origin                                           | Cultivars |
|-----|---------------------|---------------------|-----------------------------------|--------------------------------------------------|-----------|
| 243 | <i>Stipa</i>        | <i>nelsonii</i>     | Scribn.                           |                                                  |           |
| 244 | <i>Stipa</i>        | <i>papposa</i>      | Ness                              | S.America                                        |           |
| 245 | <i>Stipa</i>        | <i>pennata</i>      | Linnaeus                          | Europe, Asia temperate, N. Africa                |           |
| 246 | <i>Stipa</i>        | <i>pseudoichu</i>   | Caro                              | Argentina, Bolivia                               |           |
| 247 | <i>Stipa</i>        | <i>pulcherrima</i>  | K.Koch                            | Europe, Asia temperate, N. Africa                |           |
| 248 | <i>Stipa</i>        | <i>spartea</i>      | Trinius                           |                                                  |           |
| 249 | <i>Stipa</i>        | <i>speciosa</i>     | Trinius & Ruprecht                |                                                  |           |
| 250 | <i>Stipa</i>        | <i>stenophylla</i>  | (Cern. ex Lindem.) Trautv.        | Ukraine,                                         |           |
| 251 | <i>Stipa</i>        | <i>tenacissima</i>  | Linnaeus                          | W. Mediterranean                                 |           |
| 252 | <i>Stipa</i>        | <i>tenuissima</i>   | Trinius                           | S.America                                        |           |
| 253 | <i>Themeda</i>      | <i>australis</i>    | (R.Brown) Stapf                   | Australia, New Guinea                            | yes       |
| 254 | <i>Themeda</i>      | <i>japonica</i>     | (Willdenow) C.Tanaka              | Japan, Korea, China (Manchuria), India           |           |
| 255 | <i>Themeda</i>      | <i>triandra</i>     | Forsskal                          | S. Africa                                        |           |
| 256 | <i>Thysanolaena</i> | <i>latifolia</i>    | (Roxburgh ex Hornemann) Honda     | China, Japan, Taiwan, India, Nepal, Sri Lanka.   |           |
| 257 | <i>Tridens</i>      | <i>flavus</i>       | (Linnaeus) Hitchcock              | Thailand, Malaysia                               |           |
| 258 | <i>Tripsacum</i>    | <i>dactyloides</i>  | (Linnaeus) Linnaeus               | USA                                              |           |
| 259 | <i>Tripsacum</i>    | <i>floridanum</i>   | Porter ex Vasey                   | USA                                              |           |
| 260 | <i>Uniola</i>       | <i>latifolia</i>    | Michx.                            | S. Florida                                       |           |
| 261 | <i>Uniola</i>       | <i>paniculata</i>   | Linnaeus                          | USA                                              |           |
| 262 | <i>Vetiveria</i>    | <i>zizanioides</i>  | (Linnaeus) Nash                   | N.America Atlantic and Gulf coast, Cuba, Bahams, |           |
| 263 | <i>Zizania</i>      | <i>aquatica</i>     | Linnaeus                          | Mexico                                           |           |
| 264 | <i>Zizania</i>      | <i>latifolia</i>    | (Grisebach) Turczanionow ex Stapf | E. India                                         |           |
|     |                     |                     |                                   | N.America                                        |           |
|     |                     |                     |                                   | Japan, Taiwan, Indochina, China, Korea, E. of    |           |
|     |                     |                     |                                   | Russia (Siberia)                                 |           |
